# Supplementary material for: Telemedicine vs Telephone Consultations and Medication Prescribing Errors Among Referring Physicians: A Cluster Randomized Crossover Trial
Source: PubMed Central journal article supplement (PMC10905304; doi:10.1001/jamanetworkopen.2024.0275), 2024-02-29
Supplement: jamanetwopen-e240275-s002.pdf [file jamanetwopen-e240275-s002.pdf]

## Supplemental Online Content

Marcin JP, Lieng MK, Mouzoon J, et al. Telemedicine vs telephone consultations and medication prescribing errors among referring physicians: a cluster-randomized crossover trial. *JAMA Netw Open*. 2024;7(3):e240275. doi:10.1001/jamanetworkopen.2024.0275

### **eAppendix.** Medication Error Data Collection Instrument

This supplemental material has been provided by the authors to give readers additional information about their work.

**eAppendix: Medication Error Data Collection Instrument.**

Physician-related medication error: Defined as: Wrong dose; Wrong or inappropriate drug for condition; Wrong route; and Wrong dosage form.

- |                                                                                           |                                                                                                                           |
|-------------------------------------------------------------------------------------------|---------------------------------------------------------------------------------------------------------------------------|
| <input type="checkbox"/> Medication given but not ordered                                 | <input type="checkbox"/> Wrong route (IV, PO, PR, SQ, IM)                                                                 |
| <input type="checkbox"/> Medication ordered but not given                                 | <input type="checkbox"/> Wrong dosage form                                                                                |
| <input type="checkbox"/> Wrong drug given from what was ordered                           | <input type="checkbox"/> Wrong time (> 30 min from order)                                                                 |
| <input type="checkbox"/> Wrong dose                                                       | <input type="checkbox"/> Error related to patient information (e.g., allergy, drug interaction, renal or hepatic disease) |
| <input type="checkbox"/> Too much                                                         |                                                                                                                           |
| <input type="checkbox"/> Too little                                                       |                                                                                                                           |
| <input type="checkbox"/> Wrong or inappropriate drug ordered for condition (your opinion) | <input type="checkbox"/> Other (describe):<br>_____                                                                       |
| <input type="checkbox"/> Wrong administration technique (eg, rate)                        | _____                                                                                                                     |

Administration Technique: IV – Intravenous route, PO – Oral route, SQ – Subcutaneous route, IM – Intramuscular route.

|                                                                                                       |          |
|-------------------------------------------------------------------------------------------------------|----------|
| 1. Antipyretics                                                                                       | +/- 20%  |
| 2. Antibiotics                                                                                        | +/- 25%  |
| 3. Steroids (e.g., methyl prednisone, prednisone, prednisolone)                                       | +/- 25 % |
| 4. Narcotics (e.g., fentanyl, morphine, codeine)                                                      | +/- 25%  |
| 5. Anxiolytics (e.g., lorazepam, midazolam, diazepam)                                                 | +/- 20%  |
| 6. Code medications (e.g., boluses of atropine, epinephrine, lidocaine, adenosine, HCO <sub>3</sub> ) | +/- 10%  |
| 7. Anesthetics (e.g., ketamine, etomidate, thiopental, pentobarbital)                                 | +/- 10%  |
| 8. Paralytics (e.g., succinyl choline, vecuronium, rocuronium)                                        | +/- 20%  |
| 9. Inotropes, Vasoactives, Cardiac medications (e.g., epinephrine, lidocaine, dopamine)               | +/- 10%  |
| 10. Insulin drip                                                                                      | +/- 10%  |
| 11. Dextrose and electrolytes ( e.g., potassium, calcium)                                             | +/- 20%  |
| 12. Anticonvulsants (e.g., phenytoin, lorazepam)                                                      | +/- 20%  |

\* “Acceptable ranges” were determined to be those doses above and below the upper and lower limits of the ranges published by Lexi-Comp’s Pediatric Dosage Handbook<sup>12</sup>
